# Supplementary material for: Role of Wild Food Environments for Cultural Identity, Food Security, and Dietary Quality in a Rural American State
Source: Frontiers journal article supplement (doi:10.3389/fsufs.2022.774701), 2022-04-14
Supplement: Data_Sheet_1.xlsx [file Data_Sheet_1.xlsx]

## Sheet: Table2
Table 2. Types of wild foods procured through hunting, fishing, and foraging.
Common name	Scientific name	Family	Food Type
Hunting
Black bear	Ursus americanus	Ursidae	Bear
Big Horn sheep	Ovis canadensis	Bovidae	Bighorn sheep
Canada geese	Branta canadensis	Anatidae	Birds/Waterfowl
Coot	Fulica americana	Rallidae	Birds/Waterfowl
Dusky grouse	Dendragapus obscurus	Phasianidae	Birds/Waterfowl
Eurasian collared dove	Streptopelia decaocto	Columbidae	Birds/Waterfowl
Gray/Hungarian partridge	Perdix perdix	Phasianidae	Birds/Waterfowl
Mergansers	Mergus merganser	Anatidae	Birds/Waterfowl
Mouring Dove	Zenaida macroura	Columbidae	Birds/Waterfowl
Pigeons	Columba livia domestica	Columbidae	Birds/Waterfowl
Quail	Callipepla californica	Odontophoridae	Birds/Waterfowl
Ring-necked Pheasant / common pheasant	Phasianus colchicus	Phasianidae	Birds/Waterfowl
Ruffed grouse	Bonasa umbellus	Phasianidae	Birds/Waterfowl
Sage grouse	Centrocercus urophasianus	Phasianidae	Birds/Waterfowl
Sandhill cranes	Antigone canadensis	Gruidae	Birds/Waterfowl
Sharp-tailed grouse	Tympanuchus phasianellus	Phasianidae	Birds/Waterfowl
Snow Geese	Anser caerulescens	Anatidae	Birds/Waterfowl
Spruce grouse	Canachites canadensis	Phasianidae	Birds/Waterfowl
Swans (this is trumpeter)	Cygnus buccinator	Anatidae	Birds/Waterfowl
Tundra Swan	Cygnus columbianus	Anatidae	Birds/Waterfowl
Turkey	Meleagris gallopavo	Phasianidae	Birds/Waterfowl
Wood duck	Aix sponsa	Anatidae	Birds/Waterfowl
Bison	Bison bison	Bovidae	Bison
Mule deer	Odocoileus hemionus	Cervidae	Deer
Whitetail deer	Odocoileus virginianus	Cervidae	Deer
Elk/Wapati	Cervus canadensis	Cervidae	Elk
Mountain goat	Oreamnos americanus	Bovidae	Goat
Moose	Alces alces	Cervidae	Moose
Bobcat	Lynx rufus	Felidae	Mountain lion or bobcat
Mountain lion	Puma concolor	Felidae	Mountain lion or bobcat
Badger	Taxidea taxus	Mustelidae	Other
Pronghorn/Antelope	Antilocapra americana	Antilocapridae	Pronghorn
Cotton-tail	Sylvilagus floridanus	Leporidae	Rabbit, Squirrel, other Rodent
Jack rabbit	Lepus townsendii	Leporidae	Rabbit, Squirrel, other Rodent
Red squirrel	Tamiasciurus hudsonicus	Sciuridae	Rabbit, Squirrel, other Rodent
Richardson ground squirrel	Urocitellus richardsonii	Sciuridae	Rabbit, Squirrel, other Rodent
Coyote	Canis latrans	Canidae	Wolf/fox/coyote
Fox	Vulpes vulpes	Canidae	Wolf/fox/coyote
Wolf (grey)	Canis lupus	Canidae	Wolf/fox/coyote
Porcupine	Erethizon dorsatum	Erethizontidae	Other
Racoon	Procyon lotor	Procyonidae	Other
Turtle (this is Western painted)	Chrysemys picta	Emydidae	Other
Fishing
Bigmouth / Largemouth bass	Micropterus salmoides	Centrarchidae	Bass
Smallmouth bass	Micropterus dolomieu	Centrarchidae	Bass
Bluegill	Lepomis macrochirus	Centrarchidae	Bluegill
Large mouth / Bigmouth buffalo	ctiobus cyprinellus	Catostomidae	Buffalo
Small mouth buffalo	Ictiobus bubalus	Catostomidae	Buffalo
Burbot	Lota lota	Lotidae	Burbot
Common Carp	Cyprinus carpio	Cyprinidae	Carp
Channel catfish	Ictalurus punctatus	Ictaluridae	Catfish
Mudcat / Flathead catfish	Pylodictis olivaris	Ictaluridae	Catfish
Crappie	Pomoxis nigromaculatus	Centrarchidae	Crappie
Freshwater drum	Aplodinotus grunniens	Sciaenidae	Drum
Redfish / red drum	Sciaenops ocellatus	Sciaenidae	Drum
Gar	Lepisosteus platostomus	Lepisosteidae	Gar
Goldeye	Hiodon alosoides	Hiodontidae	Goldeye
Mullet	Mugil cephalus	Mugilidae	Mullet
Musky	Esox masquinongy	Esocidae	Musky
Northern Pikeminnow	Ptychocheilus oregonensis	Leuciscidae	Northern pikeminnow
Paddlefish	Polyodon spathula	Paddlefish	Paddlefish
Perch	Perca flavescens	Percidae	Perch
Yellow perch	Perca flavescens	Percidae	Perch
Northern Pike	Esox lucius	Esocidae	Pike
Rock fish / Striped bass	Morone saxatilis	Moronidae	Rock fish
Steelhead	Oncorhynchus. m. irideus	Salmonidae	Salmon
Sauger	Sander canadensis	Percidae	Sauger
Shovelnose Sturgeon	Scaphirhynchus platorynchus	Acipenseridae	Sturgeon
Brook Trout	Salvelinus fontinalis	Salmonidae	Trout
Brown trout	Salmo trutta	Salmonidae	Trout
Bull trout	Salvelinus confluentus	Salmonidae	Trout
Cutthroat trout	Oncorhynchus clarkii	Salmonidae	Trout
Golden trout	Oncorhynchus aguabonita	Salmonidae	Trout
Kokanee Salmon	Oncorhynchus nerka	Salmonidae	Trout
Lake trout	Salvelinus namaycush	Salmonidae	Trout
Rainbow trout	Oncorhynchus mykiss	Salmonidae	Trout
Westslope cutthroat trout	Oncorhynchus clarkii lewisi	Salmonidae	Trout
Yellowstone cutthroat trout	Oncorhynchus clarkii bouvieri	Salmonidae	Trout
Walleye	Sander vitreus	Percidae	Walleye
Lake Whitefish	Coregonus clupeaformis	Salmonidae	Whitefish
Mountain Whitefish	Prosopium williamsoni	Salmonidae	Whitefish
Foraging
Apples	Malus pumila	Rosaceae	Berries and fruits
Bearberries / Kinnikinnick	Arctostaphylos uva-ursi	Ericaceae	Berries and fruits
Blackberries	Rubus laciniatus	Rosaceae	Berries and fruits
Buffalo berries	Shepherdia argentea	Elaeagnaceae	Berries and fruits
Chokecherries	Prunus virginiana	Rosaceae	Berries and fruits
Crab apples	Malus sylvestris	Rosaceae	Berries and fruits
Currants	Ribes aureum	Grossulariaceae	Berries and fruits
Elderberries	Sambucus cerulea	Adoxaceae	Berries and fruits
Gooseberry	Solidago canadensis	Grossulariaceae	Berries and fruits
Hawthorne berries	Crataegus douglasii	Rosaceae	Berries and fruits
Huckleberries	Vaccinium membranaceum	Ericaceae	Berries and fruits
Juneberries / service berry / Saskatoon	Amelanchier alnifolia	Rosaceae	Berries and fruits
Oregon grape	Berberis repens	Berberidaceae	Berries and fruits
Raspberries	Rubus idaeus	Rosaceae	Berries and fruits
Red Elderberry	Sambucus racemosa	Caprifoliaceae	Berries and fruits
Rhubarb	Rheum rhabarbarum	Polygonaceae	Berries and fruits
Rose hips	Rosa rugosa	Rosaceae	Berries and fruits
Strawberry	Fragaria vesca	Rosaceae	Berries and fruits
Thimbleberries	Rubus parviflorus	Rosaceae	Berries and fruits
Thorn apple	Datura stramonium	Solanaceae	Berries and fruits
Whortle berries	Vaccinium scoparium	Ericaceae	Berries and fruits
Wild Plums	Prunus americana	Rosaceae	Berries and fruits
Asparagus	Asparagus officinalis	Asparagaceae	Greens
Dandelion and dandelion greens	Taraxacum lyratum	Asteraceae	Greens
Goosefoot / Lamb's quarters	Chenopodium berlandieri	Amaranthaceae	Greens
Mustards	Sinapis arvensis	Brassicaceae	Greens
Watercress	Rorippa nasturtium-aquaticum	Brassicaceae	Greens
Yellow dock	Rumex crispus	Polygonaceae	Greens
Arnica	Arnica fulgens	Asteraceae	Herbs and Medicinal plants
Aster	Aster alpinus	Asteraceae	Herbs and Medicinal plants
Belladonna	Atropa belladonna	Solanaceae	Herbs and Medicinal plants
Bistort	Polygonum bistortoides	Polygonaceae	Herbs and Medicinal plants
Burdock	Arctium minus	Asteraceae	Herbs and Medicinal plants
Calendula	Calendula arvensis	Asteraceae	Herbs and Medicinal plants
Camas	Camassia quamash	Liliaceae	Herbs and Medicinal plants
Chicory	Cichorium intybus	Asteraceae	Herbs and Medicinal plants
Cleaver	Galium aparine	Rubiaceae	Herbs and Medicinal plants
Devil's club	Oplopanax horridus	Araliaceae	Herbs and Medicinal plants
Equistium / Horsetail	Equisetum telmateia	Equisetaceae	Herbs and Medicinal plants
False Solomons Seal	Maianthemum racemosum	Asparagaceae	Herbs and Medicinal plants
Feverfew	Tanacetum parthenium	Asteraceae	Herbs and Medicinal plants
Fireweed	Chamerion angustifolium	Onagraceae	Herbs and Medicinal plants
Gentian	Gentiana affinis	Gentianaceae	Herbs and Medicinal plants
Gerenium	Geranium bicknellii	Geraniaceae	Herbs and Medicinal plants
Glacier lily	Erythronium grandiflorum	Liliaceae	Herbs and Medicinal plants
Goldon Rod	Solidago canadensis	Asteraceae	Herbs and Medicinal plants
hanbene / hebenon	Hyoscyamus niger	Solanaceae	Herbs and Medicinal plants
Hounds tongue	Cynoglossum officinale	Boraginaceae	Herbs and Medicinal plants
knapweed	Centaurea jacea	Asteraceae	Herbs and Medicinal plants
Lady fern	Athyrium filix-femina	Athyriaceae	Herbs and Medicinal plants
Lomatium	Lomatium triternatum	Apiaceae	Herbs and Medicinal plants
Mallow	Malva neglecta	Malvaceae	Herbs and Medicinal plants
Mint	Mentha arvensis	Lamiaceae	Herbs and Medicinal plants
Motherwort	Leonurus cardiaca	Lamiaceae	Herbs and Medicinal plants
Mountain mint / Escoba de la sierra	Monardella odoratissima	Lamiaceae	Herbs and Medicinal plants
Nettle	Urtica dioica	Urticaceae	Herbs and Medicinal plants
Osha	Ligusticum porteri	Apiaceae	Herbs and Medicinal plants
Oxeye daisy	Leucanthemum vulgare	Asteraceae	Herbs and Medicinal plants
Pearly everlasting	Anaphalis margaritacea	Asteraceae	Herbs and Medicinal plants
Pedicularis	Pedicularis canadensis	Orobanchaceae	Herbs and Medicinal plants
Pepermint	Mentha balsamea	Lamiaceae	Herbs and Medicinal plants
Rabbit brush	Ericameria nauseosa	Asteraceae	Herbs and Medicinal plants
Rein orchid	Piperia unalascensis	Orchidaceae	Herbs and Medicinal plants
Sage	Artemisia scopulorum	Asteraceae	Herbs and Medicinal plants
Salsify	Tragopogon dubius	Asteraceae	Herbs and Medicinal plants
Solomon Seal	Polygonatum multiflorum	Asparagaceae	Herbs and Medicinal plants
Sorrel	Rumex paucifolius	Polygonaceae	Herbs and Medicinal plants
Sweet cicely	Myrrhis odorata	Apiaceae	Herbs and Medicinal plants
toadflax	Comandra umbellata	Santalaceae	Herbs and Medicinal plants
Valerian	Valeriana acutiloba	Valerianaceae	Herbs and Medicinal plants
Vitex	Vitex agnus-castus	Lamiaceae	Herbs and Medicinal plants
Western Pasque	Anemone occidentalis	Ranunculaceae	Herbs and Medicinal plants
Yarrow	Achillea millefolium	Asteraceae	Herbs and Medicinal plants
Chanterelle	Cantharellus cibarius	Cantharellaceae	Mushroom
Morels	Morchella esculenta	Morchellaceae	Mushroom
Oyster mushroom	Pleurotus ostreatus	Pleurotaceae	Mushroom
Porcini	Boletus edulis	Boletaceae	Mushroom
Puffballs	Calvatia booniana	Agaricaceae	Mushroom
Amaranth	Amaranthus retroflexus	Amaranthaceae	Nuts and seeds
Flax	Linum usitatissimum	Linaceae	Nuts and seeds
Pine nuts	Pinus edulis	Pinaceae	Nuts and seeds
Sunflower	Helianthus annuus	Asteraceae	Nuts and seeds
Chives	Allium schoenoprasum	Liliaceae	Wild chives, onions, leeks
Leeks	Allium tricoccum	Amaryllidaceae	Wild chives, onions, leeks
Wild onion	Allium textile	Liliaceae	Wild chives, onions, leeks
Cattail	Typha latifolia	Typhaceae	Other
Cocklebur root	Xanthium strumarium	Asteraceae	Other
Cottonwood buds	Populus deltoides	Salicaceae	Other
Fir cones	Pseudotsuga menziesii	Pinaceae	Other
Juniper	Juniperus communis	Cupressaceae	Other
Spruce tips	Picea glauca	Pinaceae	Other
Willow bark	Salix bebbiana	Salicaceae	Other
